# Supplementary material for: Activation of Multiple Transcriptional Regulators by Growth Restriction in Pseudomonas aeruginosa
Source: PubMed Central journal article supplement — Mol Cells. 2014 Jun 13;37(6):480–6. doi: 10.14348/molcells.2014.0105 (PMC4086342; doi:10.14348/molcells.2014.0105), 2014-06-13
Supplement: molcell-37-6-480-supplementary.pdf [file molcell-37-6-480-supplementary.pdf]

Supplemental data

Fig. S1

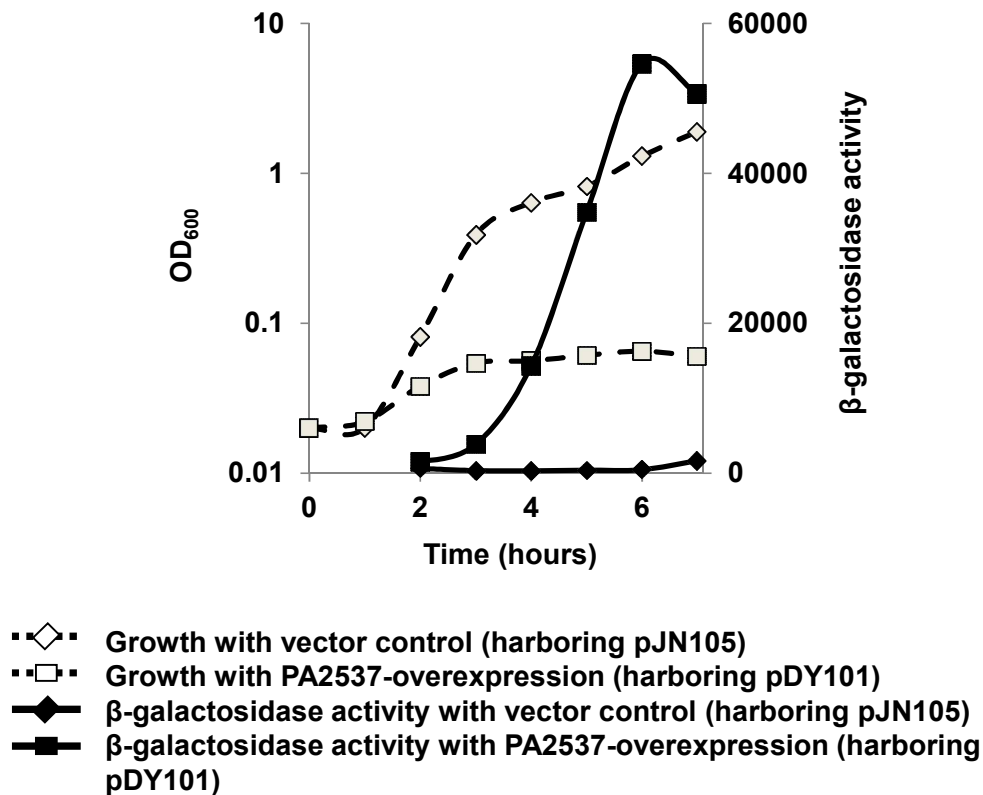

**Fig. S1. Growth restriction and QscR activation by PA2537 overexpression.** QscR activity was measured by the PA1897-*lacZ* fusion. Since PA1897 is specifically induced by QscR (Lee *et al.*, 2006), the β-galactosidase activity reflects the QscR activity. Two compatible plasmids, pJL101 (PA1897-*lacZ* fusion plasmid) and pDY101 (PA2537-overexpressing plasmid) were co-introduced into PA01 cells and the transformed cells were cultivated. The β-galactosidase activity was measured along with the growth. In vector control, cells harbored pJN105, the parental plasmid of pDY101.

Fig. S2. Schematic illustration of method

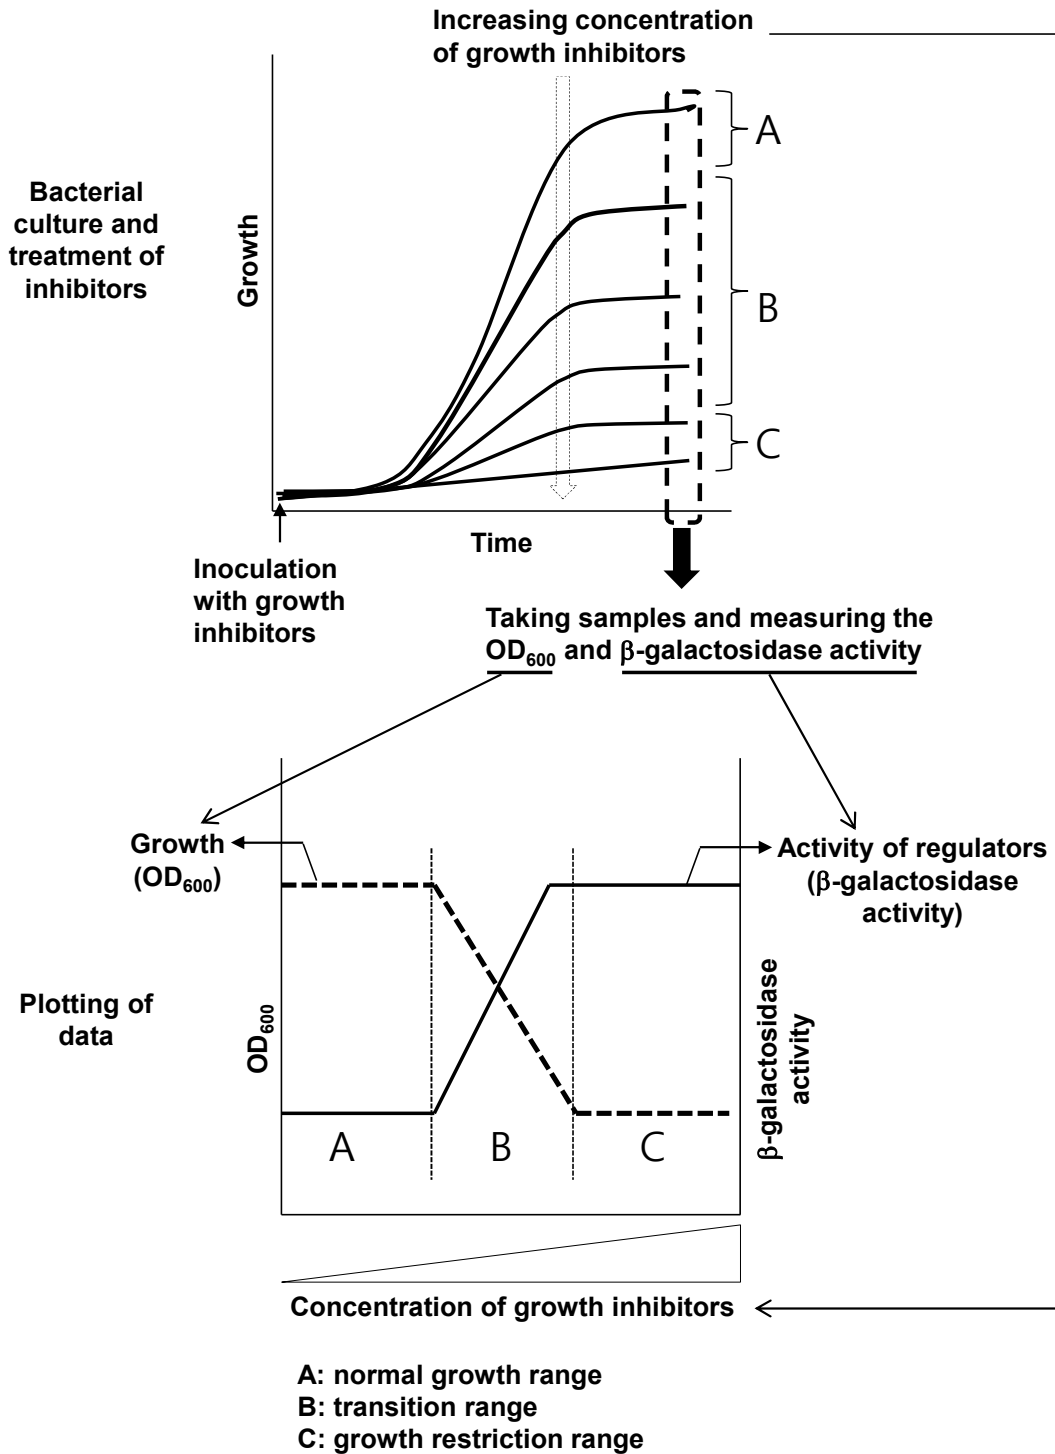

**Fig. S2. Schematic illustration of method** upper graph illustrates the culture conditions used in this study and lower graph explains how we plotted the data from the results. We compared the activity of the regulators between normal growth (A) and growth restriction range (C).
